1 **FLIES INFECTED BY ENTOMOPATHOGENIC FUNGI IN AN URBAN FRAGMENT**  
2 **OF SEMIDECIDUOUS FOREST**

3  
4 Bruno Corrêa Barbosa<sup>1\*</sup>, Tatiane Tagliatti Maciel<sup>1</sup>, Fábio Prezoto<sup>1</sup>

5 (1) Laboratório de Ecologia Comportamental e Bioacústica (LABEC), Universidade Federal de Juiz  
6 de Fora, Juiz de Fora, Minas Gerais, Brasil. E-mail: [barbosa.bc@outlook.com](mailto:barbosa.bc@outlook.com)

7  
8 **Abstract:** Entomopathogenic fungi parasitize a wide variety of hosts may be involved in regulating  
9 the populations of these arthropods helping maintain stability in tropical forest ecosystems. The  
10 genus *Ophiocordyceps* and *Entomophthora* contains several species of entomopathogenic fungi  
11 specialized to infect and kill their hosts due to development and the need for transmission by  
12 manipulating host behavior. Despite mounting research in the area, works with parasitized flies are  
13 scarce. This study aims to describe associations between the occurrence of entomopathogenic fungi  
14 and parasitic flies of the family Muscidae and behaviors presented by these flies parasitized in an  
15 urban fragment of semideciduous forest in southeastern Brazil. Were recorded two species of  
16 entomopathogenic fungi parasitizing flies collected for the first time in this locality, *E. muscae* and  
17 *O. dipterigena*. Different from Diptera parasitized by different fungi behaviors were observed.  
18 These new records of occurrence, along with data on their hosts, suggest that many species of this  
19 group have not yet registered. Therefore, more studies in tropical forests will certainly increase the  
20 knowledge about these interactions.

21  
22 **Keywords:** *Entomophthora*, fungal diversity, Muscidae, *Ophiocordyceps*, parasite manipulation.

23  
24 **INTRODUCTION**

25 The entomopathogenic fungi parasitizing a wide variety of hosts (SAMSON & EVANS 1982,  
26 1984; KOBAYASI 1941) and may change their behavior in order to favor the dispersion of the  
27 manipulator (ANDERSEN *et al.* 2009). There are records of infection of these fungi in eleven insect  
28 orders: Hymenoptera, Diptera, Coleoptera, Hemiptera, Lepidoptera, Orthoptera, Isoptera, Blattodea,  
29 Odonata, Mantodea and Dermaptera, and other arthropods such as spiders (EVANS 1982). It is  
30 believed that these fungi are involved in regulating the populations of these arthropods may help  
31 maintain stability in the tropical forest ecosystems (EVANS 1982).

32 The genus *Ophiocordyceps* and *Entomophthora* contains several species of  
33 entomopathogenic fungi specialized to infect and kill their hosts due to a development and  
34 transmission necessity (STEENBERG *et al.* 2001; EVANS *et al.* 2011). Some species, such as  
35 *Ophiocordyceps unilateralis sensu lato*, are capable to manipulate the host's behavior, causing it to

1 abandon the colony and act in detriment to its own to enhance the parasite's fitness (ANDERSEN *et*  
2 *al.* 2009). This behavior, in which genes of the parasite are expressed in the host's phenotype, may  
3 be classified as an extended phenotype (DAWKINS 1982).

4 Due to the high abundance, fungal infections in Formicidae are the most reported and most  
5 well known. The infection occurs during foraging when the ants come into contact with the spores  
6 that get stuck in their body and penetrate their cuticle. The period of the fungus infection occurs  
7 within three to six days after spore adhesion of the body surface ant. Once infected, an individual  
8 dies and the fungus produces a fruiting body that grows just behind the head of the parasitized  
9 insect. For this structure, the fungus produces spores that are dispersed across the forest floor, where  
10 they, infect new hosts (EVANS 1982; EVANS & SAMSON 1982, 1984; PONTOPPIDAN *et al.* 2009).

11 On the other hand, records the occurrence of infection of entomopathogenic fungi in Diptera  
12 are scarce, as well as information about the behavioral changes caused by the fungus and their  
13 hosts. Thus, this study describes the occurrence of parasitic associations between entomopathogenic  
14 fungi and flies of the family Muscidae and a brief description of their behavior in an urban fragment  
15 of Atlantic rainforest in southeastern Brazil.

16

## 17 **METHODS AND MATERIALS**

18 Records occurred in 2014 and were held in the Botanical Garden of the Federal University  
19 of Juiz de Fora (21 ° 43 '28 "S - 43 ° 16' 47" W), a fragment of Semideciduous Seasonal Forest  
20 Montana (VELOSO *et al.* 1991) recently classified by SANTIAGO *et al.* (2014) as expressive richness,  
21 diversity and floristic diversity of woody vegetation, with endangered species with predominance of  
22 pioneer plant complex, besides the considerable presence of exotic species. The area of 84 hectares  
23 of extension is located within the city limits of Juiz de Fora, southeastern state of Minas Gerais,  
24 Brazil (Figure 1), 750 m above sea featuring warm subtropical climate with dry winter and wet  
25 summer level (Cwa), according to the classification of Köppen (SÁ-JUNIOR 2009).

26 Fungi were also identified by Prof. Harry Evans, CABI and João Paulo Machado de Araujo  
27 of Pennsylvania State University, based on morphological analysis of fruiting bodies and  
28 identification of the hosts present.

29

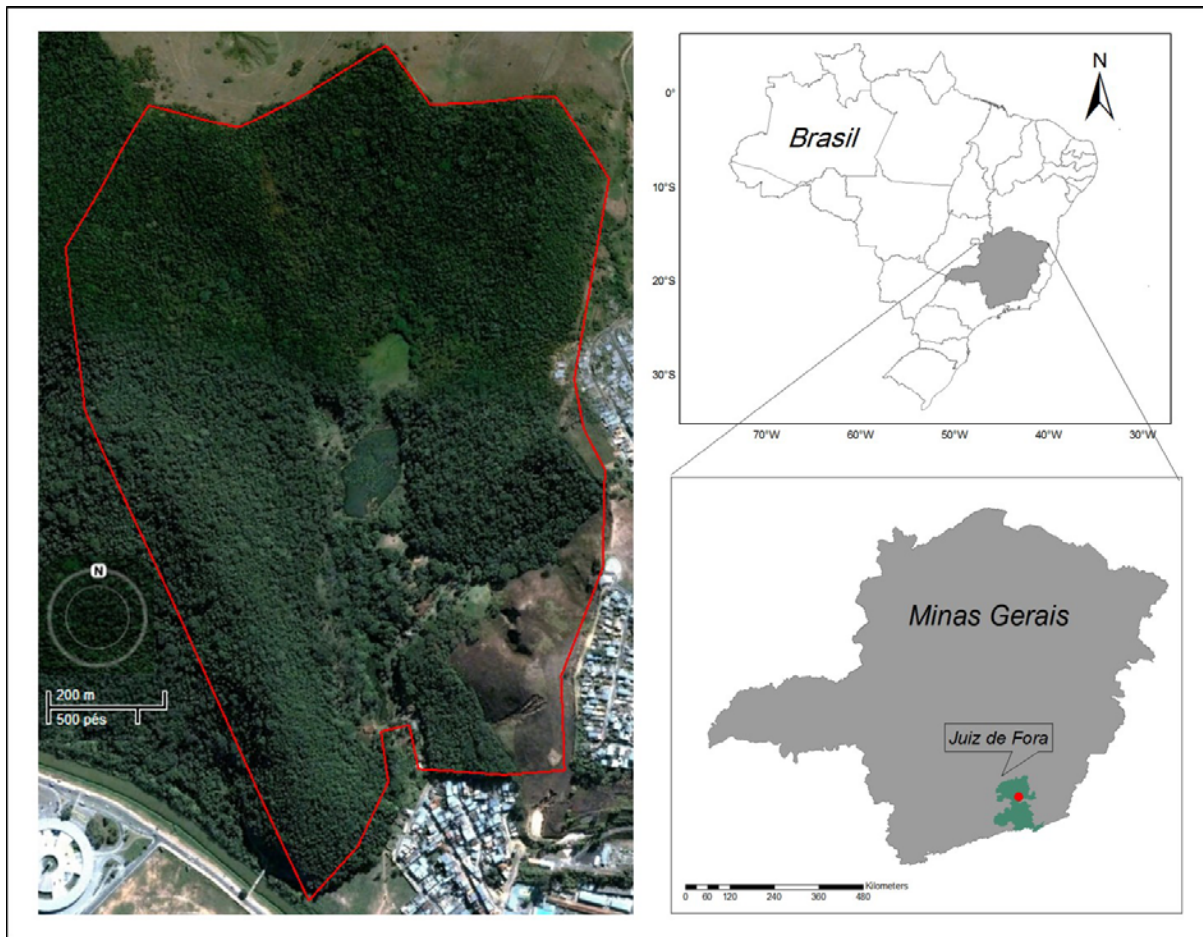

1

2 Figure 1: Location of the Botanical Garden of the Federal University of Juiz de Fora, Brazil.

3

#### 4 **RESULTS AND DISCUSSION**

5 Two species of entomopathogenic fungi were collected for the first time in this locality,  
6 *Entomophthora muscae* (Cohn) Fresen. (Figure 2a and 2b) and *Ophiocordyceps dipterigena* (Berk.  
7 & Broome) G.H. Sung, J.M. Sung, Hywel-Jones & Spatafora (Figure 2c and 2d) with host on adult  
8 of Diptera (Muscidae).

9 Due to the effect of partial decomposition caused by the fungus, the identification of Diptera  
10 were only possible family level (Muscidae) for the individual parasitized by *Ophiocordyceps*  
11 *dipterigena* and gender (*Musca* sp) for the individual parasitized by *Entomophthora muscae*.

12 In this study, fungal species showed distinct forms as the manipulation of the setting  
13 behavior where *E. muscae* seems to control the fly in looking for a vine leaf, and with his legs cling,  
14 favoring for development the fungus. It was observed that the fungus monopolize the entire surface  
15 of the fly between the membranes including the abdominal segments, mesossomal and sclerites  
16 (Figure 2a and 2b). The species *O. dipterigena* seems manipulate the insect to land on a sheet

1 without the need to hold her where, after the death of the fly, the fruiting body emerges,  
2 extrapolated the body of the fly, getting out of the inside through the head (Figure 2c and 2d).

3 As data on these parasitic associations are still rare, especially in anthropogenic areas  
4 (TRAVIS *et al.* 1993; LASTRA *et al.* 2006; SUNG *et al.* 2007), these new records of occurrence, along  
5 with data on their hosts, suggest that many species of this group have not yet registered. Therefore,  
6 more studies in tropical forests will certainly increase the knowledge about these interactions.

7

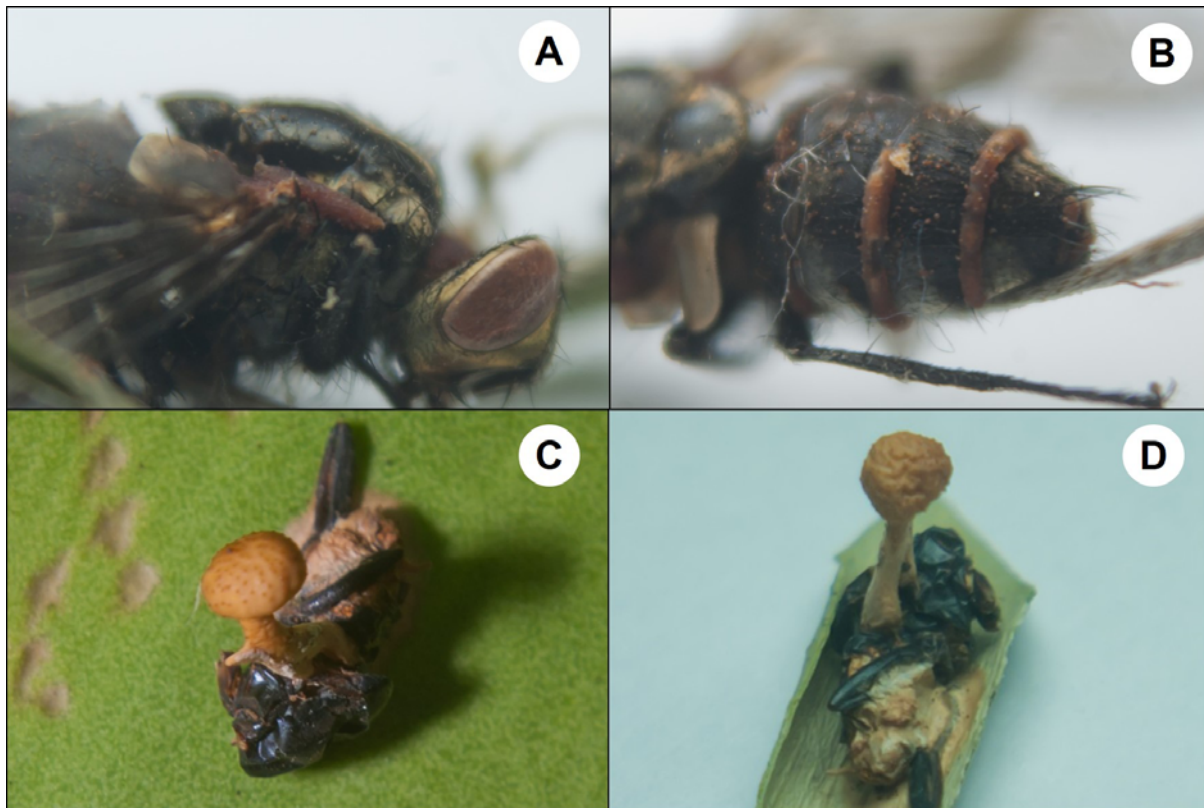

8

9 Figure 2: Flies infected by entomopathogenic fungi found in the Botanical Garden of the Federal  
10 University of Juiz de Fora: A and B - Fly parasitized by *Entomophthora muscae*; C and D - Fly  
11 parasitized by *Ophiocordyceps dipterigena*.

12

### 13 REFERENCES

- 14 Andersen, S.B., S. Gerritsma, K.M., Yusah, D., Mayntz, N.L., Hywel-Jones, J., Billen, J.J.  
15 Boomsma & D.P., Hughes, 2009. The life of a dead ant: the expression of an adaptive extended  
16 phenotype. *The American Naturalist*, 174: 424-33.
- 17 Dawkins, R., 1982. *The Extended Phenotype*. Oxford (UK): Oxford University Press., 307 p.
- 18 Evans, H.C. & R.A., Samson, 1984. Cordyceps species and their anamorphs pathogenic on ants  
19 (Formicidae) in tropical forest ecosystems II. The *Camponotus* (Formicinae) complex. *Transactions*  
20 *of the British Mycological Society*, 82: 127-150.



- 1 Evans, H.C., 1982. Entomogenous fungi in the tropical forest ecosystems: na appraisal. Ecological  
2 Entomology, 7: 47-60.
- 3 Evans, H.C., S.L., Elliot & D.P., Hughes, 2011. Hidden diversity behind the zombie-ant fungus  
4 *Ophiocordyceps unilateralis*: four new species described from carpenter ants in Minas Gerais,  
5 Brazil. PLoS ONE, 6: e17024.
- 6 Lastra, C.C.L., A., Siri, J.J., García, J., Eilenberg & R.A., Humber, 2006. *Entomophthora*  
7 *ferdinandii* (Zygomycetes: Entomophthorales) causing natural infections of *Musca domestica*  
8 (Diptera: Muscidae) in Argentina. Mycopathologia 161: 251-254.
- 9 Pontoppidan, M.B., W., Himaman, N.L., Hywel-Jones, J.J., Boomsma & D.P., Hughes, 2009.  
10 Graveyards on the move: the spatio-temporal distribution of dead *Ophiocordyceps*-infected ants.  
11 PLoS ONE 4: e4835.
- 12 Sá Júnior, A., 2009. Aplicação da classificação de Köppen para o zoneamento climático do estado  
13 de Minas Gerais. Dissertação (Ph.D. em Engenharia Agrícola) - Universidade Federal de Lavras,  
14 101 p.
- 15 Santiago, D.S., C.R. da Fonseca & F.A., Carvalho, 2014. Fitossociologia da regeneração natural de  
16 um fragmento urbano de Floresta Estacional Semidecidual (Juiz de Fora, MG). Revista Brasileira  
17 de Ciências Agrárias, 9: 117-123.
- 18 Steenberg, T., J.B., Jespersen, K.M.V., Jensen, B.O., Nielsen & R.A., Humbert, 2001.  
19 Entomopathogenic fungi in flies associated with pasture cattle in Denmark. Journal of Invertebrate  
20 Pathology, 77: 186–197.
- 21 Sung, G.H., N.L., Hywell-Jones, J.M., Sung, J.J., Luangsa-ard, B., Shrestha & J.W., Spatafora.  
22 2007. Phylogenetic classification of *Cordyceps* and the clavicipitaceous fungi. Studies in Mycology,  
23 57: 5-59.
- 24 Travis, R.G., M., O'Callaghan & P.J., Wigley, 1993. Checklist of naturally occurring  
25 entomopathogenic microbes and nematodes in New Zealand, New Zealand Journal of Zoology, 20:  
26 95-120.
- 27 Veloso, H.P., A.L.R., Rangel-Filho & J.C.A. Lima, 1991. Classificação da vegetação brasileira  
28 adaptada a um sistema universal. Rio de Janeiro: IBGE, 124p.
